# Supplementary material
Source: publisher figshare collection journal article supplement (https://tandf.figshare.com/ndownloader/files/17878310)
Supplement: Supplementary file 1 [file 17878310]

|  |  |
| --- | --- |

Fig S1. Gas chromatogram (a) and HPLC chromatogram (b) of derived biodiesel using NiMo/La-Al2O3 catalysts
